# Supplementary material
Source: MDPI journal article supplement (https://www.mdpi.com/2673-8392/2/3/109)
Supplement: s1 [file s1]

**Table S1.** Average Ratings on COVID-TIS from 1 (Strongly Disagree) to 5 (Strongly Agree).

|                                                                                                          | Job Loss<br>(n=187) |              | No Job Loss<br>(n=1,028) |              | Overall<br>(N=1,215) |              |
|----------------------------------------------------------------------------------------------------------|---------------------|--------------|--------------------------|--------------|----------------------|--------------|
|                                                                                                          | M                   | 95%CI        | M                        | 95%CI        | M                    | 95%CI        |
| <b>Material Subscale</b>                                                                                 | 3.20                | [3.09, 3.32] | 2.94                     | [2.89, 2.99] | 2.98                 | [2.93, 3.03] |
| I spend my time in difference places now than I did before the COVID-19 Pandemic.                        | 3.36                | [3.14, 3.59] | 3.33                     | [3.23, 3.42] | 3.33                 | [3.25, 3.42] |
| I own different things now than I did before the COVID-19 Pandemic.                                      | 2.01                | [1.84, 2.17] | 1.98                     | [1.91, 2.05] | 1.98                 | [1.92, 2.05] |
| My material circumstances now are different than they were before the COVID-19 Pandemic.                 | 3.53                | [3.35, 3.71] | 2.62                     | [2.54, 2.71] | 2.76                 | [2.68, 2.84] |
| The activities I engage in now are different from the ones I engaged in before the COVID-19 Pandemic.    | 4.08                | [3.93, 4.23] | 3.93                     | [3.86, 4.00] | 3.95                 | [3.89, 4.01] |
| The people I spend time with now are not the same people I spent time with before the COVID-19 Pandemic. | 3.04                | [2.84, 3.25] | 2.84                     | [2.76, 2.92] | 2.87                 | [2.79, 2.95] |
| <b>Psychological Subscale</b>                                                                            | 3.40                | [3.27, 3.53] | 3.08                     | [3.02, 3.13] | 3.13                 | [3.07, 3.18] |
| My current attitudes are different than the attitudes I held before the COVID-19 Pandemic.               | 3.68                | [3.50, 3.86] | 3.31                     | [3.23, 3.39] | 3.37                 | [3.30, 3.44] |
| I think about things differently now than I did before the COVID-19 Pandemic.                            | 3.98                | [3.82, 4.14] | 3.67                     | [3.59, 3.74] | 3.71                 | [3.65, 3.78] |
| My emotional responses now are different than they were before the COVID-19 Pandemic.                    | 3.68                | [3.51, 3.86] | 3.38                     | [3.31, 3.46] | 3.43                 | [3.36, 3.50] |
| My sense of self now is different than it was before the COVID-19 Pandemic.                              | 3.39                | [3.20, 3.58] | 2.92                     | [2.83, 3.00] | 2.99                 | [2.91, 3.06] |
| My understanding of right and wrong now is different than it was before the COVID-19 Pandemic.           | 2.27                | [2.09, 2.44] | 2.10                     | [2.03, 2.17] | 2.13                 | [2.06, 2.19] |
| <b>TIS Total</b>                                                                                         | 3.30                | [3.20, 3.40] | 3.01                     | [2.96, 3.05] | 3.05                 | [3.01, 3.09] |

Note: Reproduced and adapted from “Assessing the Transitional Impact and Mental Health Consequences of the COVID-19 Pandemic Onset” by E. Z. Heanoy, L. Shi, and N. R. Brown, 2021, *Frontiers in Psychology*, 11:607976. Copyright 2021 under the terms of Creative Commons Attribution License (CC BY).
